# Supplementary material for: The Upconversion Luminescence of Ca3Sc2Si3O12:Yb3+,Er3+ and Its Application in Thermometry
Source: MDPI journal article supplement (doi:10.3390/nano13131910), 2023-06-22
Supplement: s1 [file s1]

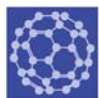

# The Upconversion Luminescence of $\text{Ca}_3\text{Sc}_2\text{Si}_3\text{O}_{12}:\text{Yb}^{3+},\text{Er}^{3+}$ and Its Application in Thermometry

Junyu Hong <sup>1</sup>, Feilong Liu <sup>2</sup>, Miroslav D. Dramićanin <sup>3</sup>, Lei Zhou <sup>1,\*</sup> and Mingmei Wu <sup>1</sup>

<sup>1</sup> School of Chemical Engineering and Technology, Sun Yat-sen University, Zhuhai 519082, China; hongjy23@mail.sysu.edu.cn (J.H.); ceswmm@mail.sysu.edu.cn (M.W.)

<sup>2</sup> School of Marine Sciences, Sun Yat-sen University, Zhuhai 519082, China; liufelong3@mail2.sysu.edu.cn

<sup>3</sup> Center of Excellence for Photoconversion, Vinča Institute of Nuclear Sciences-National Institute of the Republic of Serbia, University of Belgrade, PO Box 522, 11,001 Belgrade, Serbia; dramican@vinca.rs

\* Correspondence: zhoul8@mail.sysu.edu.cn

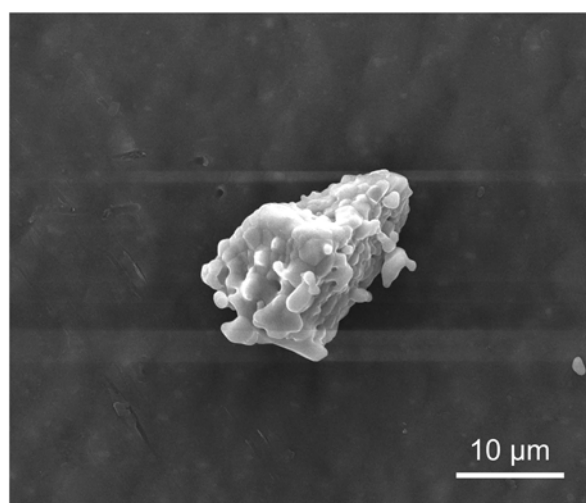

**Figure S1.** SEM image of  $\text{CSS:0.2Yb}^{3+},0.02\text{Er}^{3+}$ .

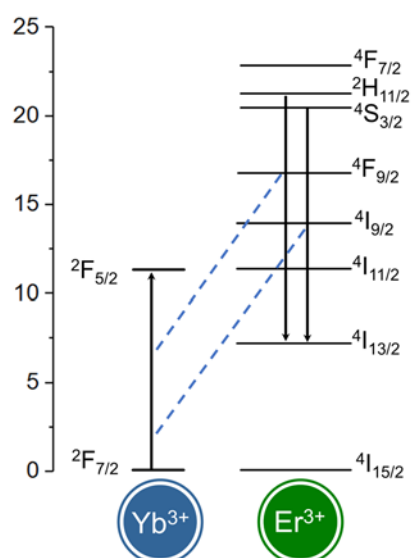

**Figure S2.** the cross-relaxation of  ${}^2\text{H}_{11/2}/{}^4\text{S}_{3/2} (\text{Er}^{3+}) + {}^2\text{F}_{7/2} (\text{Yb}^{3+}) \rightarrow {}^4\text{I}_{13/2} (\text{Er}^{3+}) + {}^2\text{F}_{5/2} (\text{Yb}^{3+})$ .

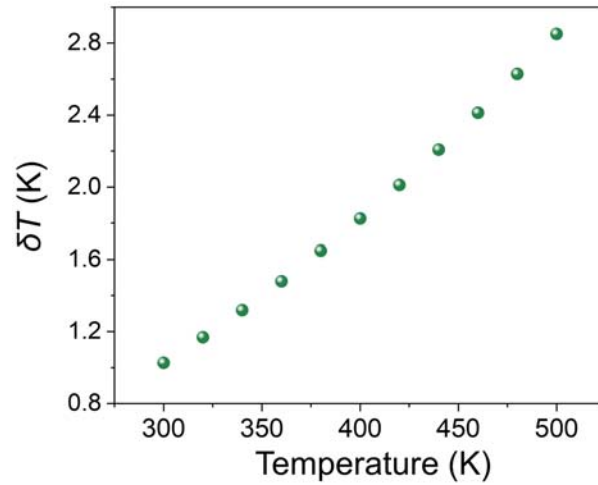

**Figure S3.** The temperature resolution of CSS:0.2Yb<sup>3+</sup>,0.02Er<sup>3+</sup>.

Temperature resolution ( $\delta T$ ) is an important parameter to characterize the performance of optical thermometer, which is defined as:<sup>1-2</sup>

$$\delta T = \frac{1}{S_r} \frac{\delta FIR}{FIR} \quad (S1)$$

Where  $\delta FIR/FIR$  represents the relative standard deviation of the measurement. According to Equ. (1), the calculated temperature resolution  $\delta T$  is shown in Figure. S3 and the minimum value of  $\delta T$  is 1.03 K at 300 K.

## References

1. Liu, S.; Cui, J.; Jia, J.; Fu, J.; You, W.; Zeng, Q.; Yang, Y.; Ye, X. High sensitive Ln<sup>3+</sup>/Tm<sup>3+</sup>/Yb<sup>3+</sup> (Ln<sup>3+</sup>=Ho<sup>3+</sup>, Er<sup>3+</sup>) tri-doped Ba<sub>3</sub>Y<sub>4</sub>O<sub>9</sub> upconverting optical thermometric materials based on diverse thermal response from non-thermally coupled energy levels. *Ceram. Int.* **2019**, *45*, 1–10.
2. Wu, H.; Hao, Z.; Zhang, L.; Zhang, X.; Xiao, Y.; Pan, G.-H.; Wu, H.; Luo, Y.; Zhang, L.; Zhang, J. Er<sup>3+</sup>/Yb<sup>3+</sup> codoped phosphor Ba<sub>3</sub>Y<sub>4</sub>O<sub>9</sub> with intense red upconversion emission and optical temperature sensing behavior. *J. Mater. Chem. C* **2018**, *6*, 3459–3467.
